# Supplementary material for: Epitope Coverage of Anti-SARS-CoV-2 Nucleocapsid IgA and IgG Antibodies Correlates with Protection against Re-Infection by New Variants in Subsequent Waves of the COVID-19 Pandemic
Source: MDPI journal article supplement (doi:10.3390/v15020584), 2023-02-20
Supplement: s1 [file s1]

# Epitope Coverage of Anti-SARS-CoV-2 Nucleocapsid IgA and IgG Antibodies Correlates with Protection against Re-Infection by New Variants in Subsequent Waves of the COVID-19 Pandemic

Michelle O. Mullins <sup>1</sup>, Muneerah Smith <sup>1</sup>, Hazel Maboreke <sup>1</sup>, Andrew J. M. Nel <sup>1</sup>, Ntobeko A. B. Ntusi <sup>2</sup>, Wendy A. Burgers <sup>3,4,5</sup> and Jonathan M. Blackburn <sup>1,5,\*</sup>

<sup>1</sup> Department of Integrative Biomedical Sciences, Faculty of Health Sciences, University of Cape Town, Cape Town 7925, South Africa

<sup>2</sup> Department of Medicine, University of Cape Town and Groote Schuur Hospital, Cape Town 7925, South Africa

<sup>3</sup> Wellcome Centre for Infectious Diseases Research in Africa, University of Cape Town, Cape Town 7925, South Africa

<sup>4</sup> Division of Medical Virology, Department of Pathology, University of Cape Town, Cape Town 7925, South Africa

<sup>5</sup> Institute of Infectious Disease and Molecular Medicine, Faculty of Health Sciences, University of Cape Town, Cape Town 7925, South Africa

\* Correspondence: jonathan.blackburn@uct.ac.za; Tel.: +27-214-066-071

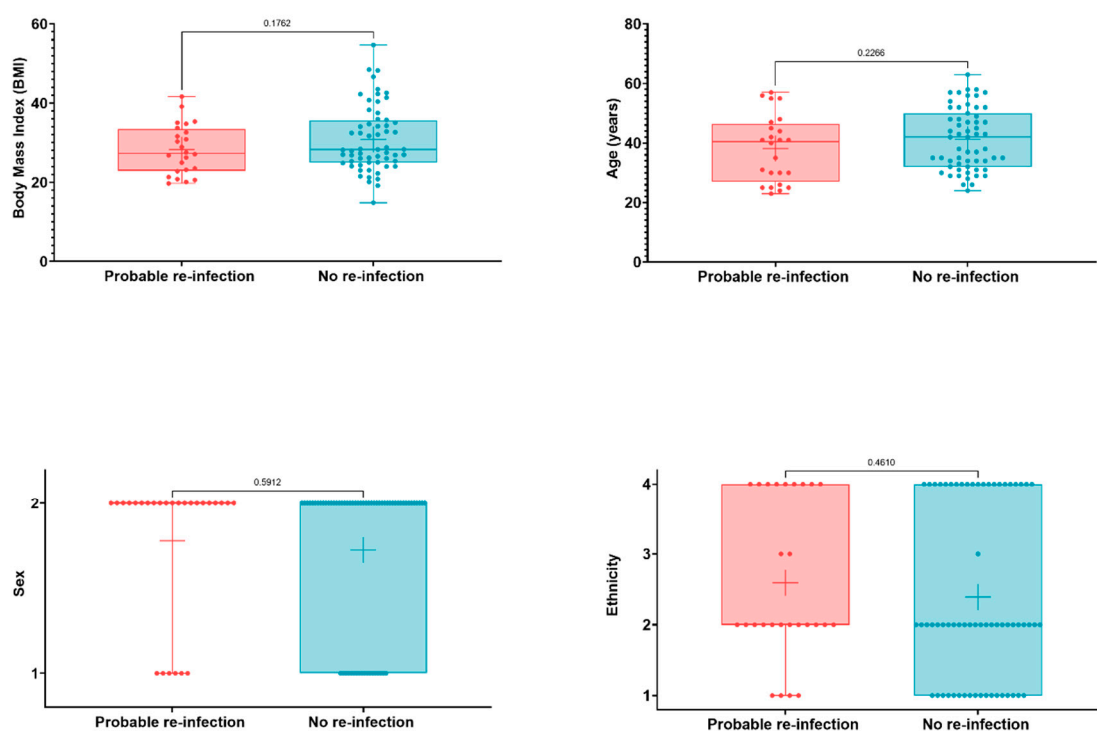

Figure S1: Influence of BMI, age, sex, and ethnicity on the likelihood of re-infection. Sex: 1 = male, 2 = female; Ethnicity: 1 = white, 2 = mixed ethnic groups, 3 = Asian, 4 = black/African. Pairwise comparisons were made using a one-way ANOVA, and *p*-values were calculated using Welch's correction to compare the mean of each category to the mean of each other category. Samples sizes: probable re-infection: *n* = 28, no re-infection: *n* = 59.
